# Supplementary material for: Classification challenges of the 2019 revised International Standards for Neurological Classification of Spinal Cord Injury (ISNCSCI)
Source: PubMed Central journal article supplement (PMC8737267; doi:10.1038/s41393-021-00648-y), 2021-06-04

S. Kirshblum, M. Schmidt Read, and R. Rupp, Classification challenges of the 2019 revised International Standards for Neurological Classification of Spinal Cord Injury (ISNCSCI), *Spinal Cord*, 2021

This supplement contains the complete classification results of the five cases with classification challenges presented in the manuscript “Classification challenges of the 2019 revised International Standards for Neurological Classification of Spinal Cord Injury (ISNCSCI)” from S. Kirshblum, M. Schmidt Read and R. Rupp.

Supplementary figure 1: Complete classification of case 1 with unimpaired sensory function on the left side and a motor impairment of the left long toe extensor due to an old tibia fracture documented as 1\* in the left L5 segment.

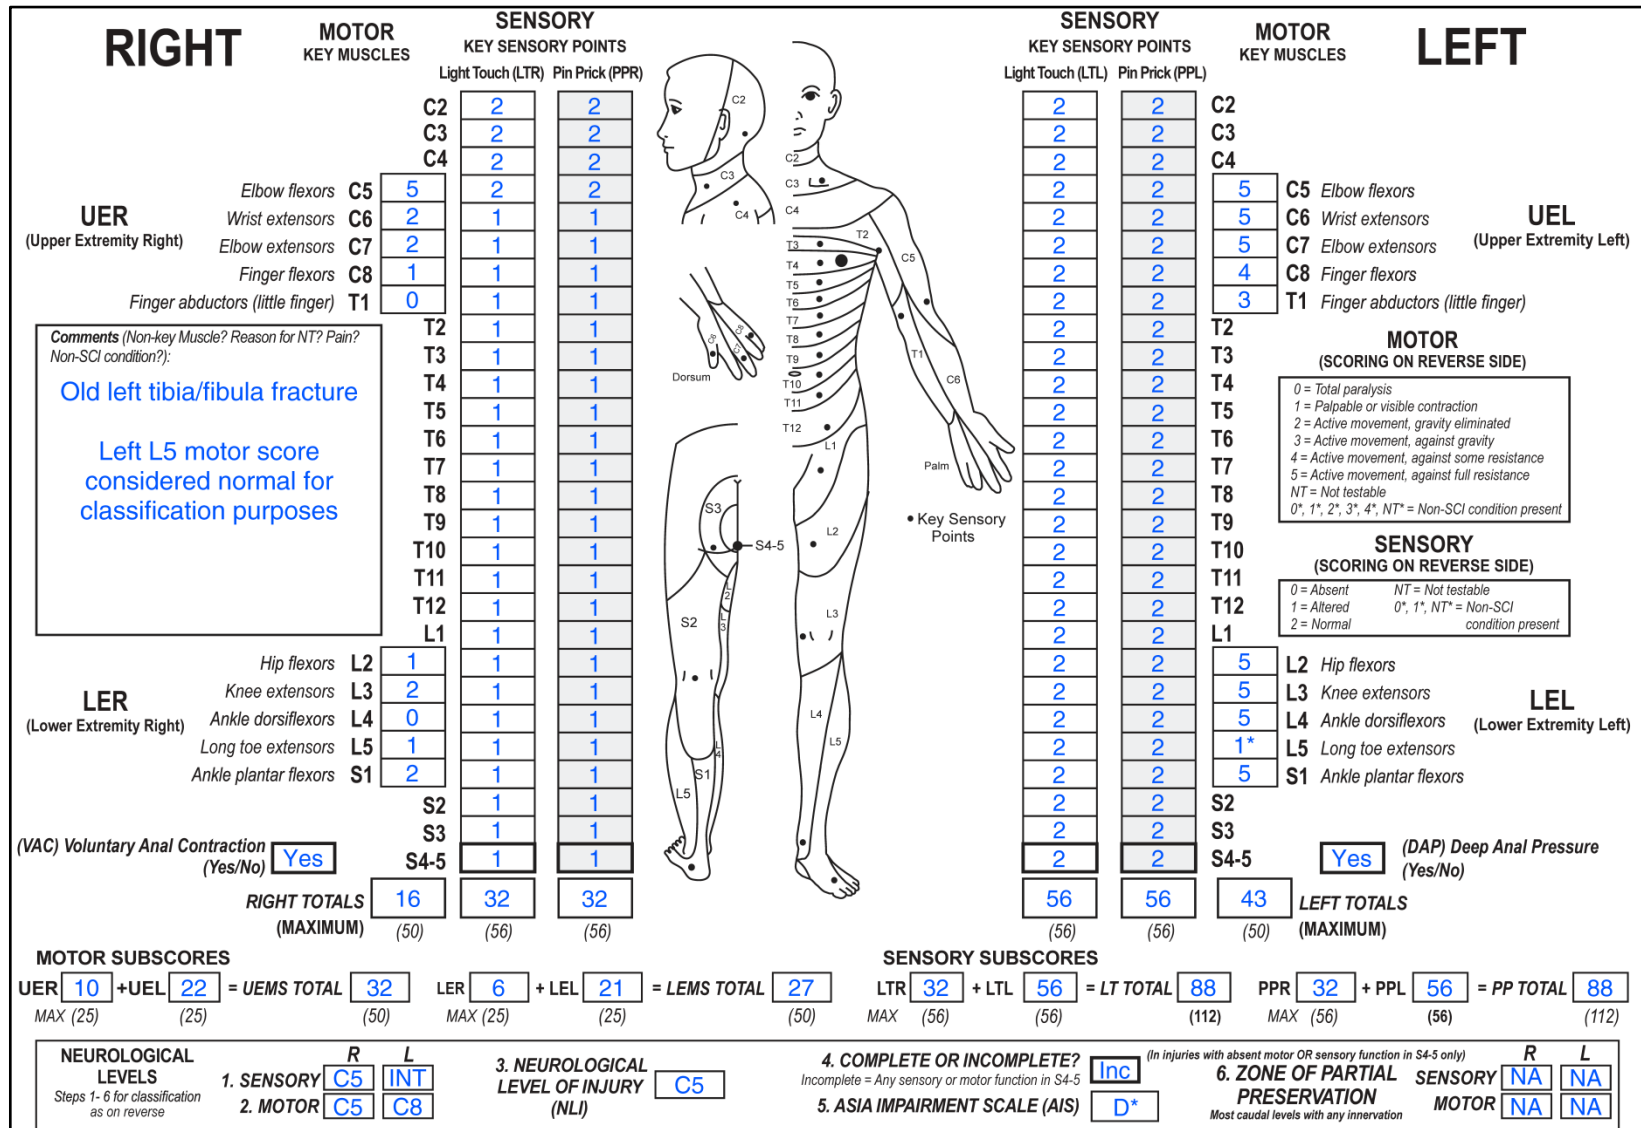

Supplementary figure 2: Complete classification of case 2 of a complete (AIS A) thoracic lesion with some sensory functions preserved below the NLI.

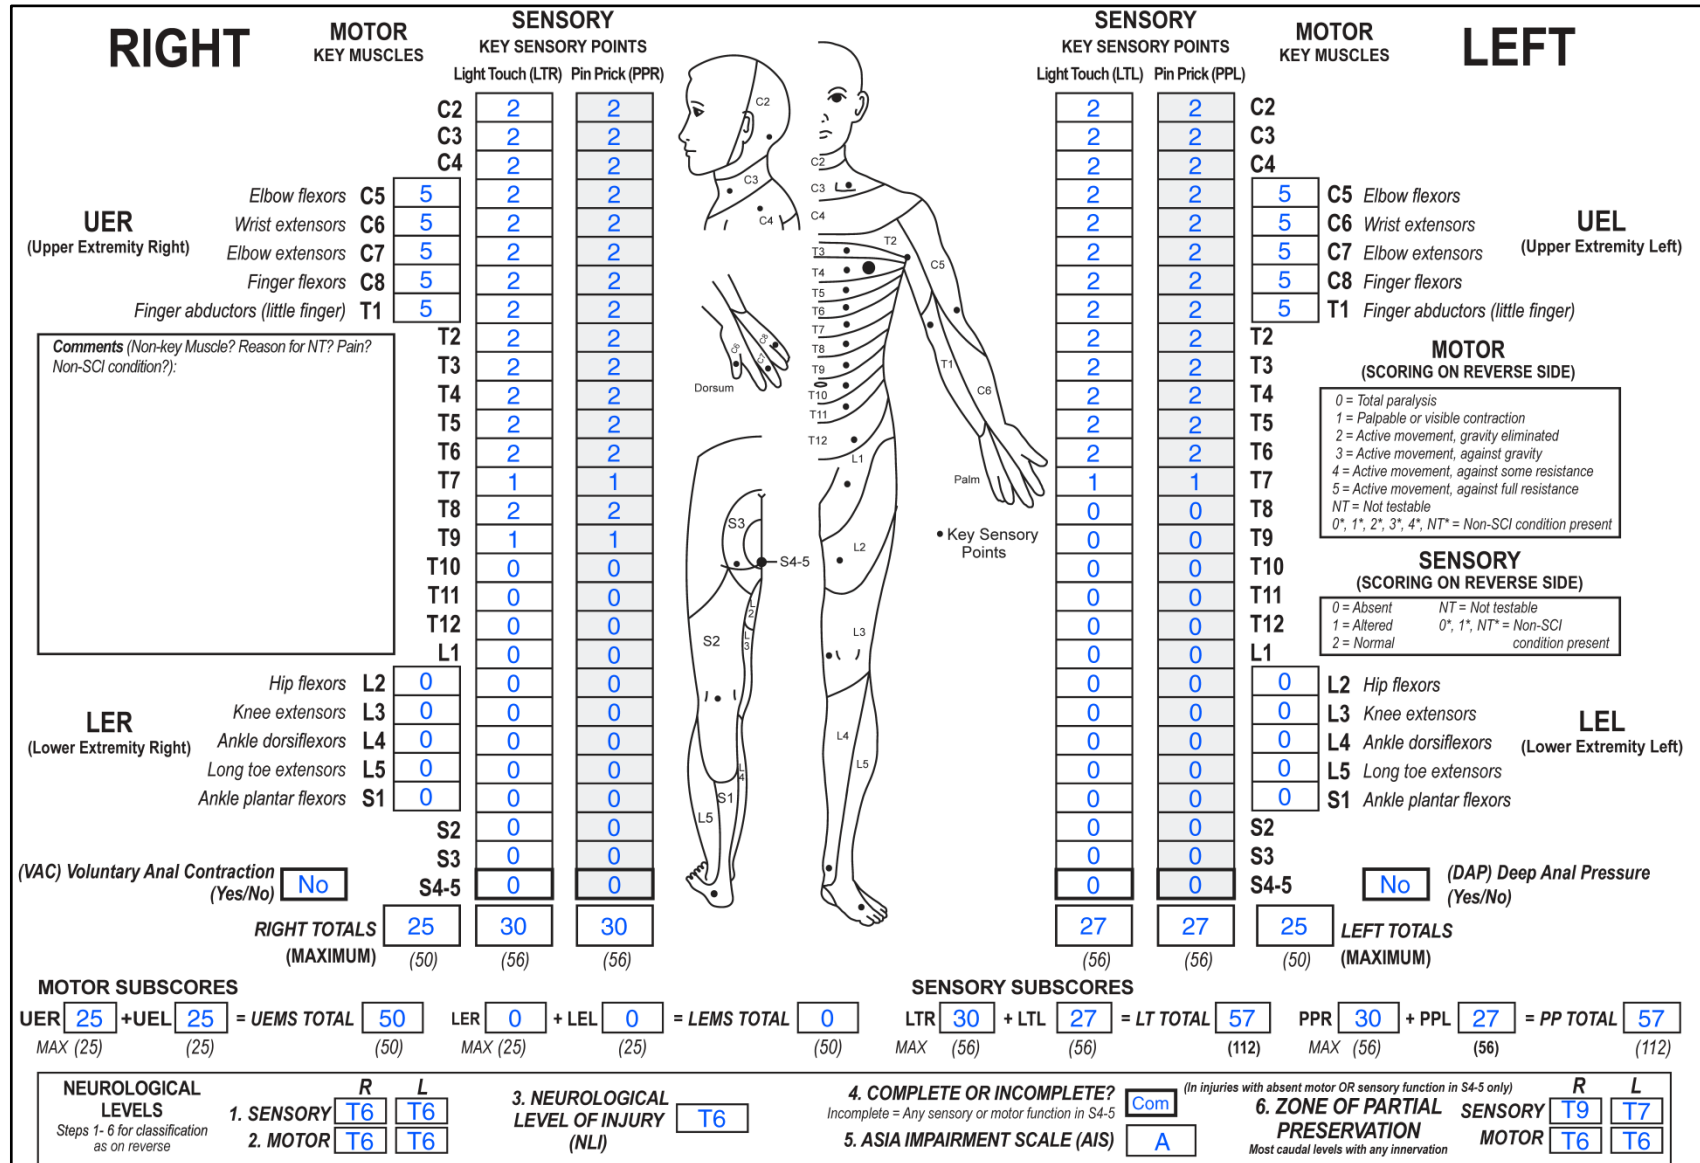

Supplementary figure 3: Complete classification of case 3 of an ambulatory person with a substantial preservation of motor functions below the motor level, but no sacral sparing of sensory and motor functions.

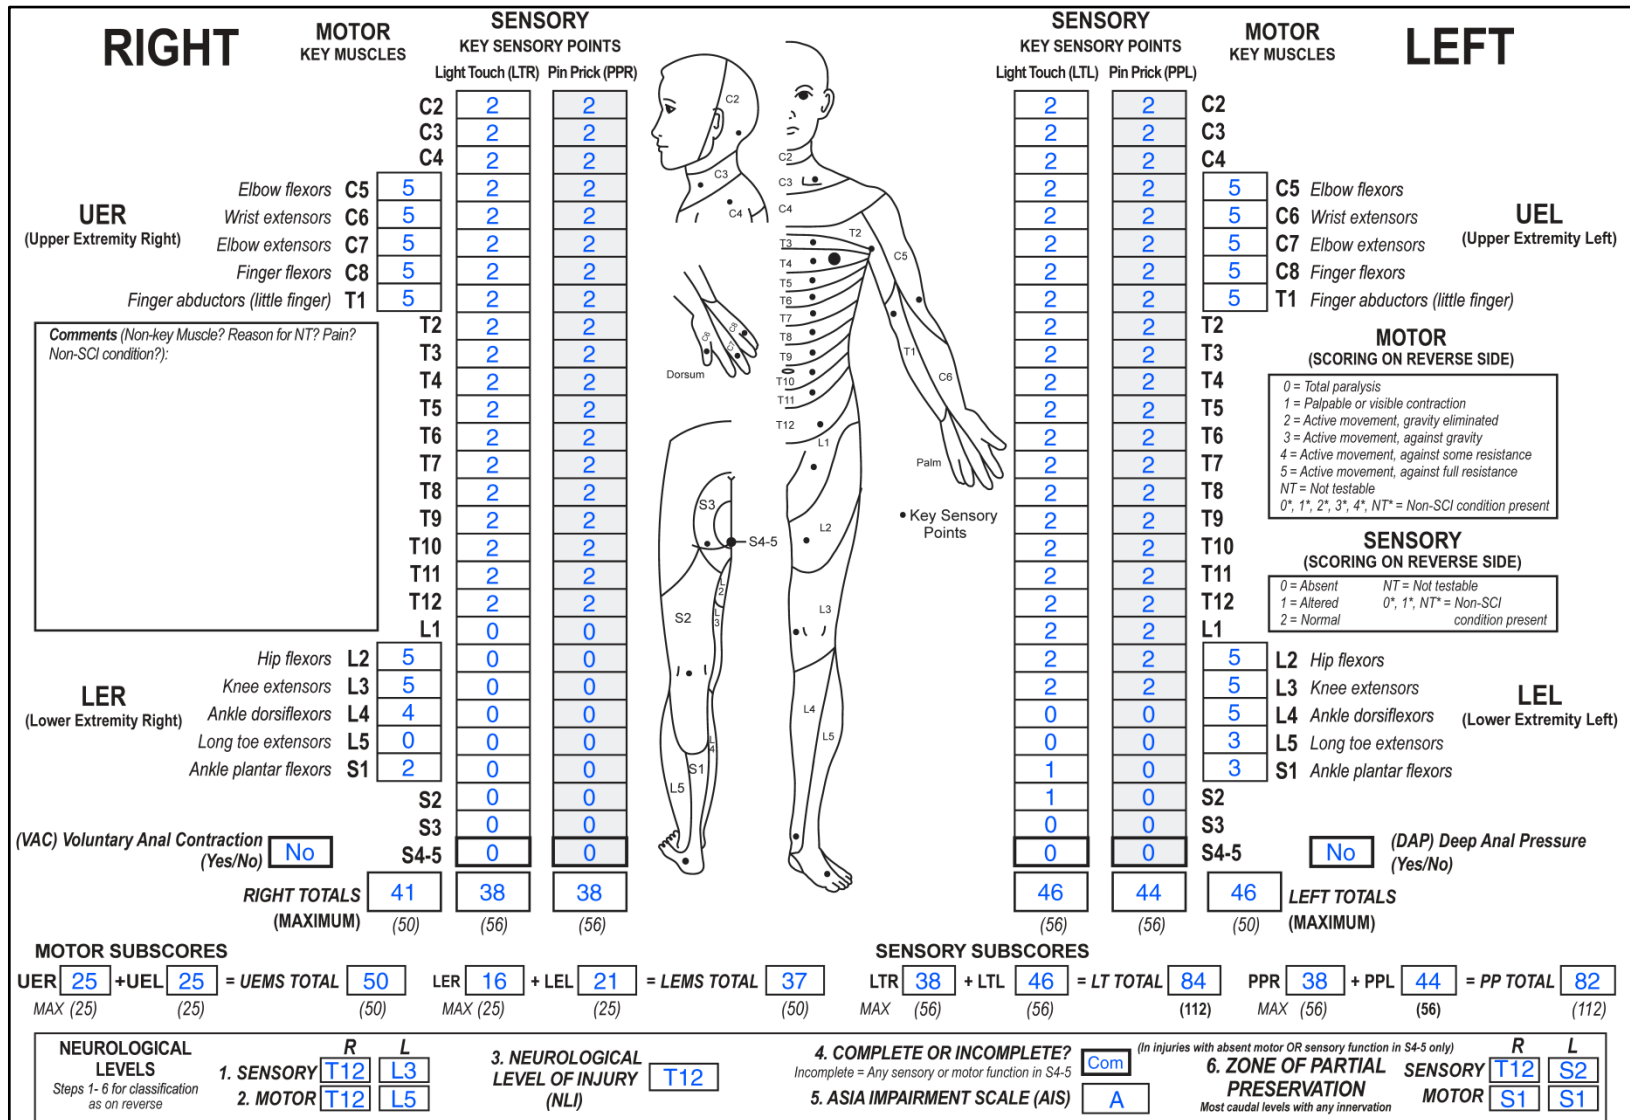

Supplementary figure 4: Complete Classification of case 4 of a high thoracic lesion with spared sensory function in S4-5 on the left side and motor function in a non-key muscle (hip adductor) on the right side.

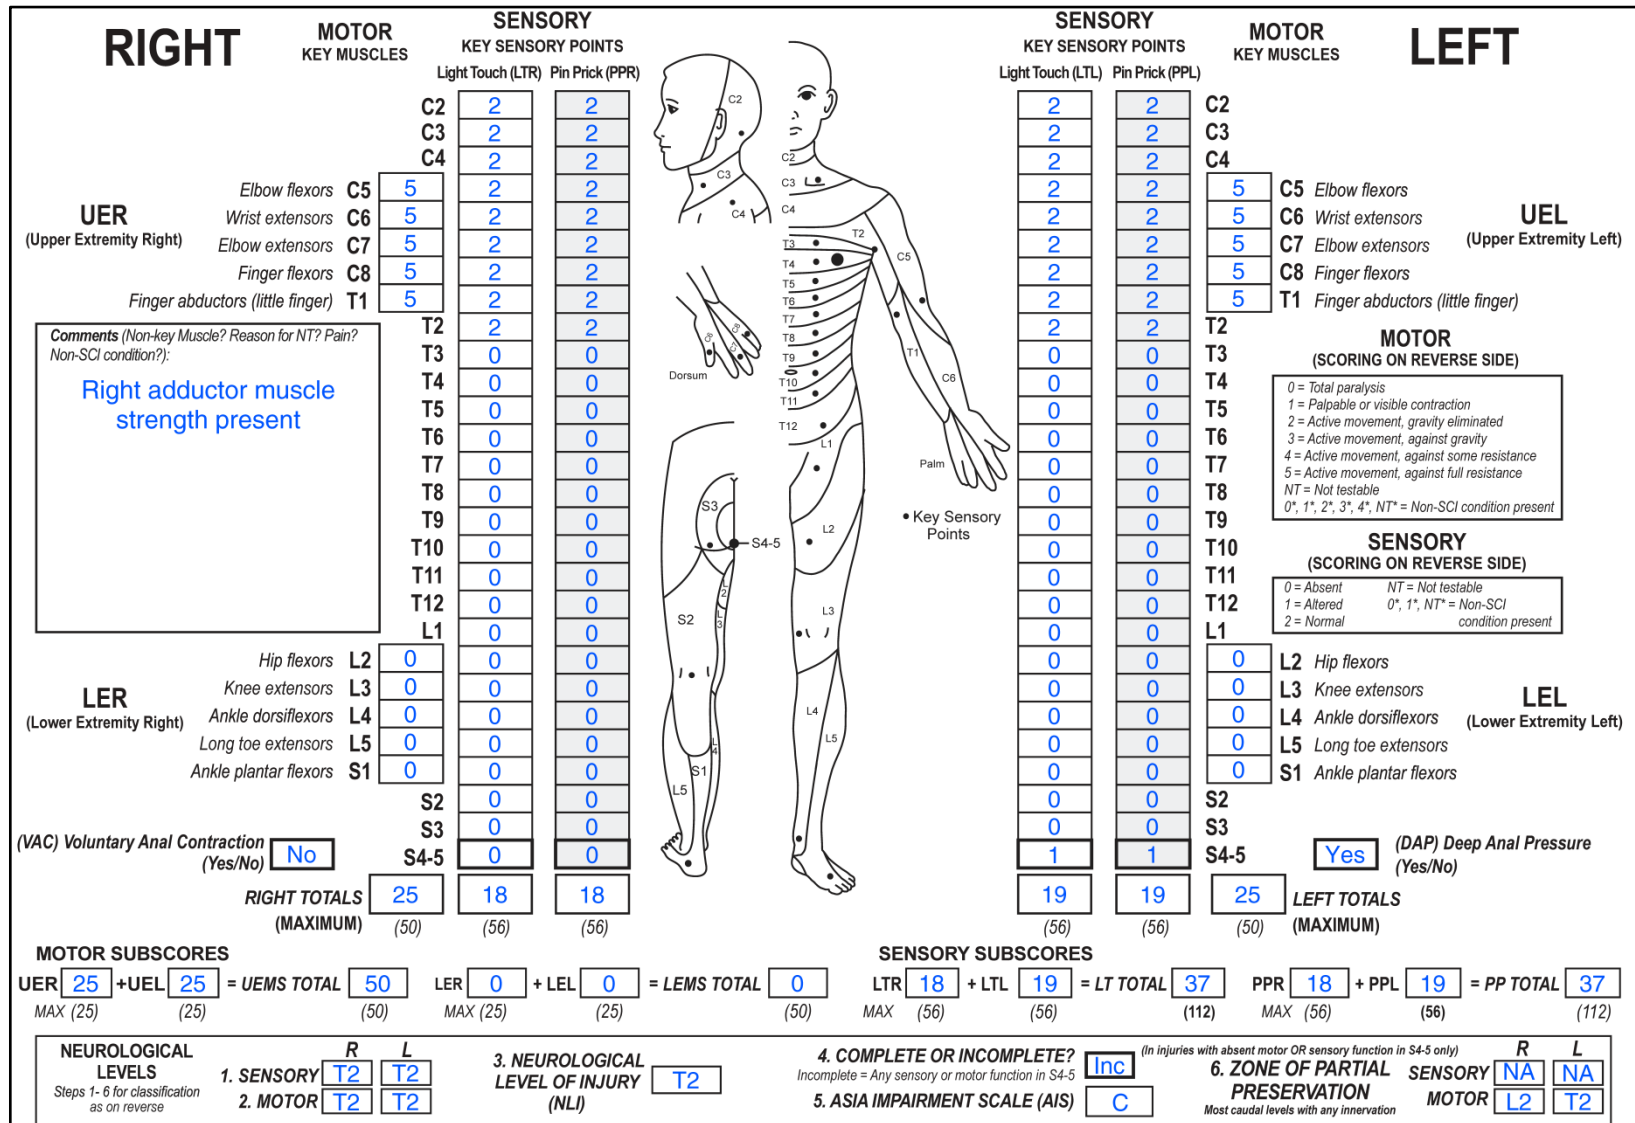

Supplementary figure 5: Complete classification of case 5 with a mid-thoracic lesion and a transradial amputation of the right upper extremity.

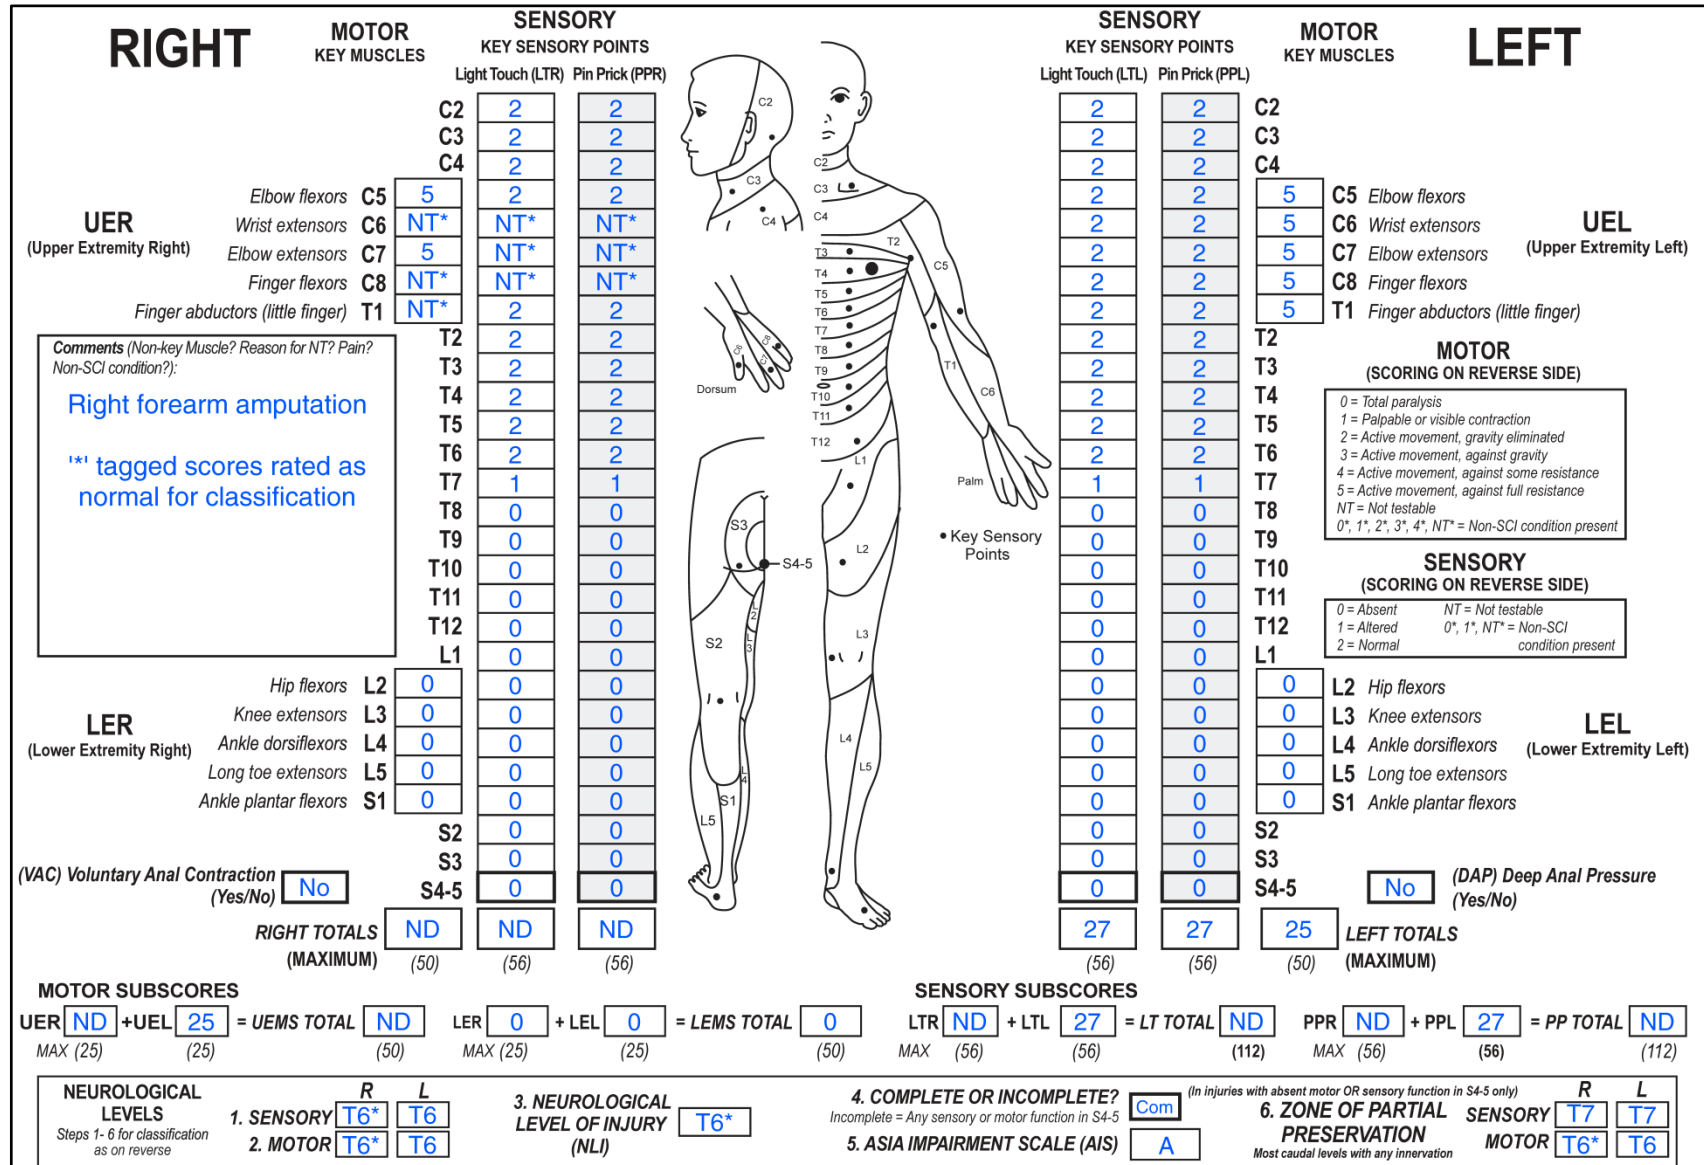

Supplement: 41393_2021_648_MOESM1_ESM.pdf [file 41393_2021_648_MOESM1_ESM.pdf]
